# Supplementary material for: MSC Secretome as a Promising Tool for Neuroprotection and Neuroregeneration in a Model of Intracerebral Hemorrhage
Source: MDPI journal article supplement (doi:10.3390/pharmaceutics13122031), 2021-11-29
Supplement: s1 [file s1]

# Supplementary Materials: MSC Secretome as a Promising Tool for Neuroprotection and Neuroregeneration in a Model of Intracerebral Hemorrhage

Maxim Karagyaour \*, Stalik Dzhauari, Nataliya Basalova, Natalia Aleksandrushkina, Georgy Sagaradze, Natalia Danilova, Pavel Malkov, Vladimir Popov, Maria Skryabina, Anastasia Efimenko and Vsevolod Tkachuk

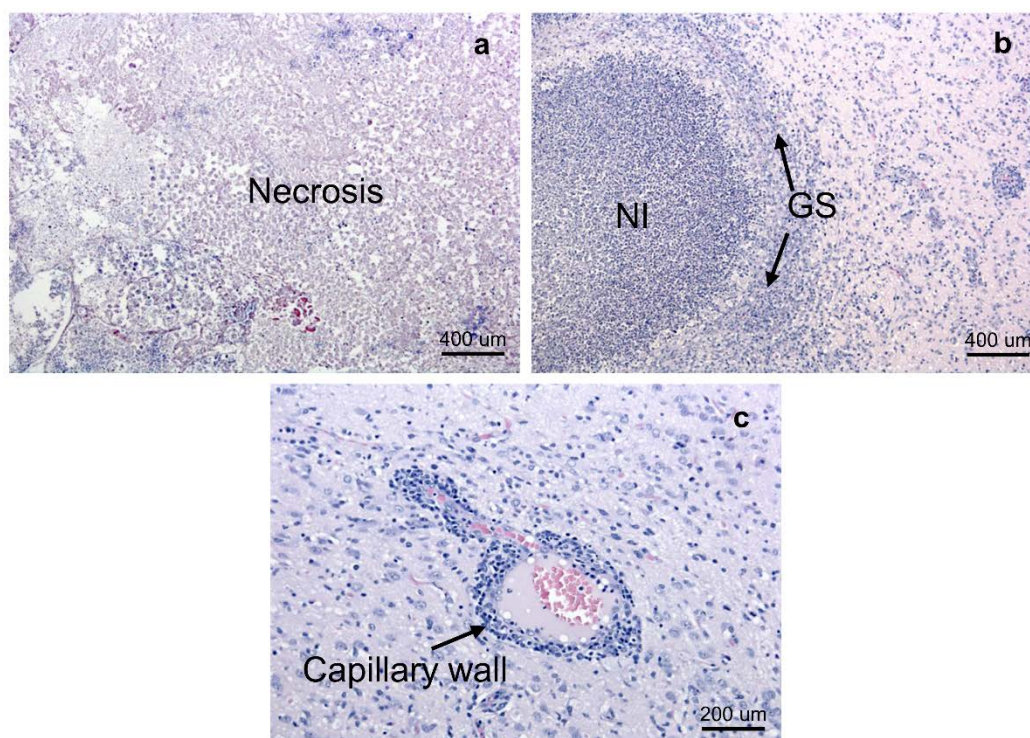

**Figure S1.** Histological signs of brain tissue damage (hematoxylin-eosin): (a,b) a necrosis focus restrained by neutrophil infiltration (NI) and a glial scar (GS); (c) signs of blood stasis and leukocyte migration through the capillary wall.

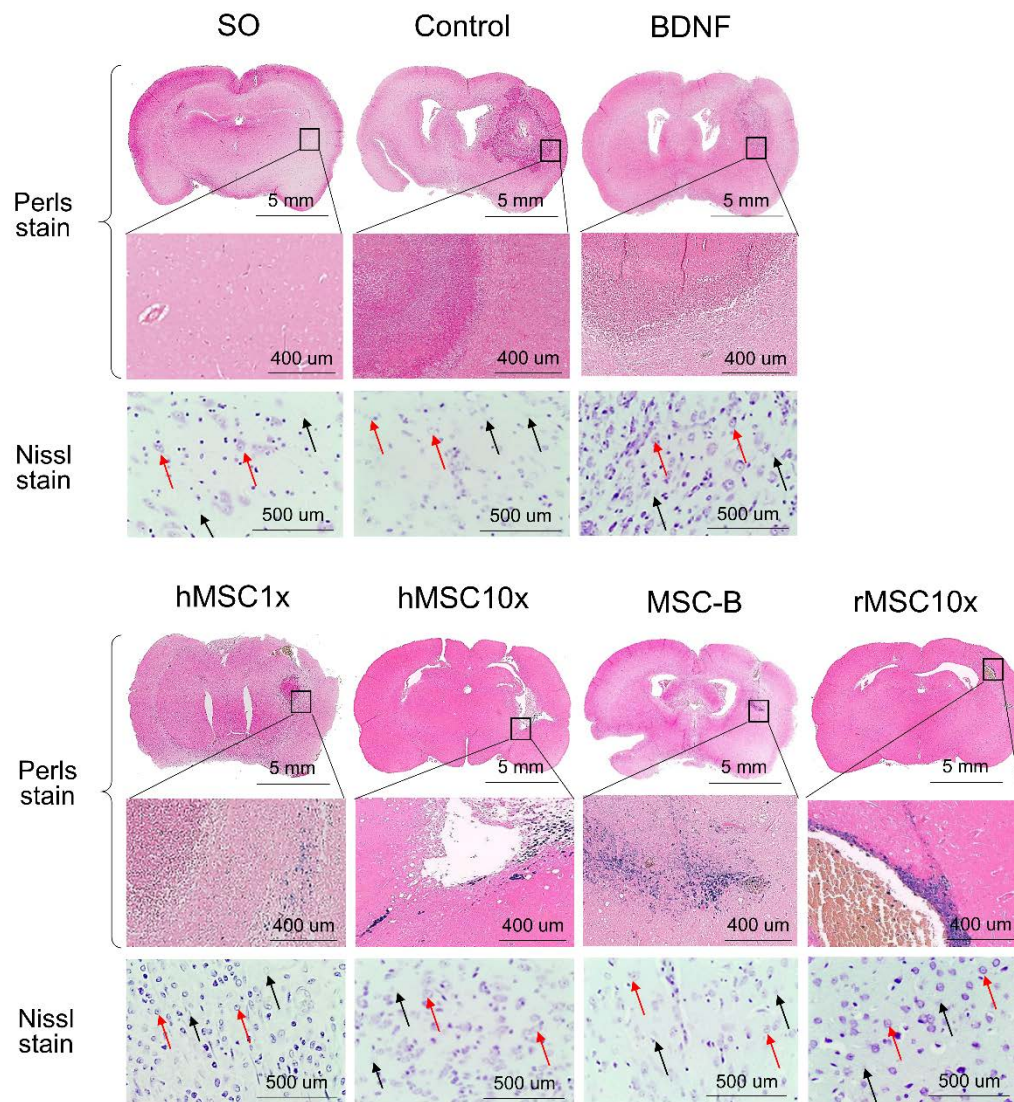

**Figure S2.** Histological examination of brain slices. Perls stain reveals hemosiderin deposits (blue grains). Nissl stain reflects the functional state of neurons in the penumbra: red arrows show alive though hypoxic neurons; black arrows show dead neurons (neuron shadows).

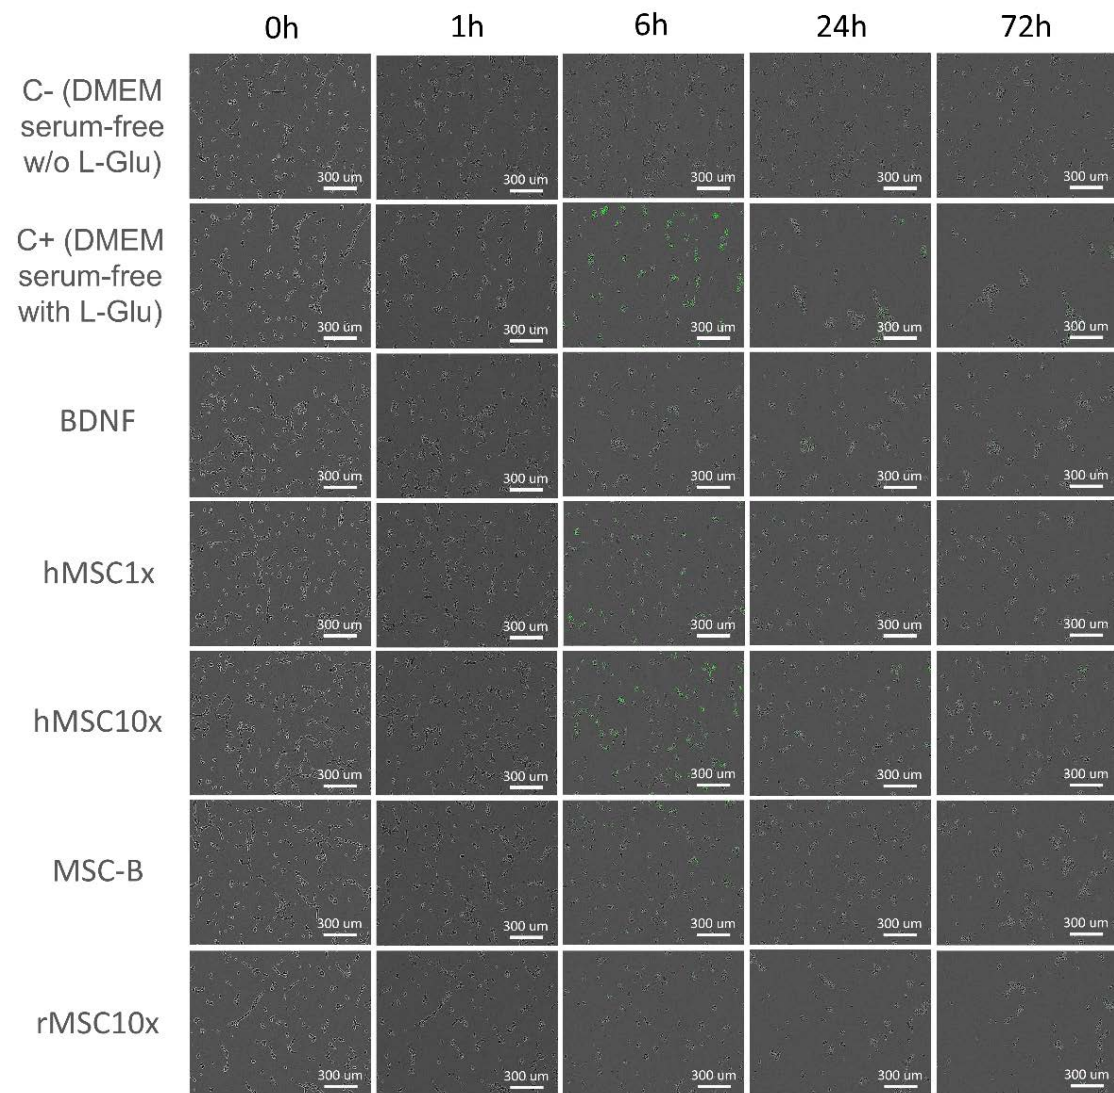

**Figure S3.** Samples of images (raw data) obtained during the study of neuroprotective activity of MSC secretomes in the model of *in vitro* glutamate-induced neurotoxicity. Green stain marks dead cells (apoptosis).



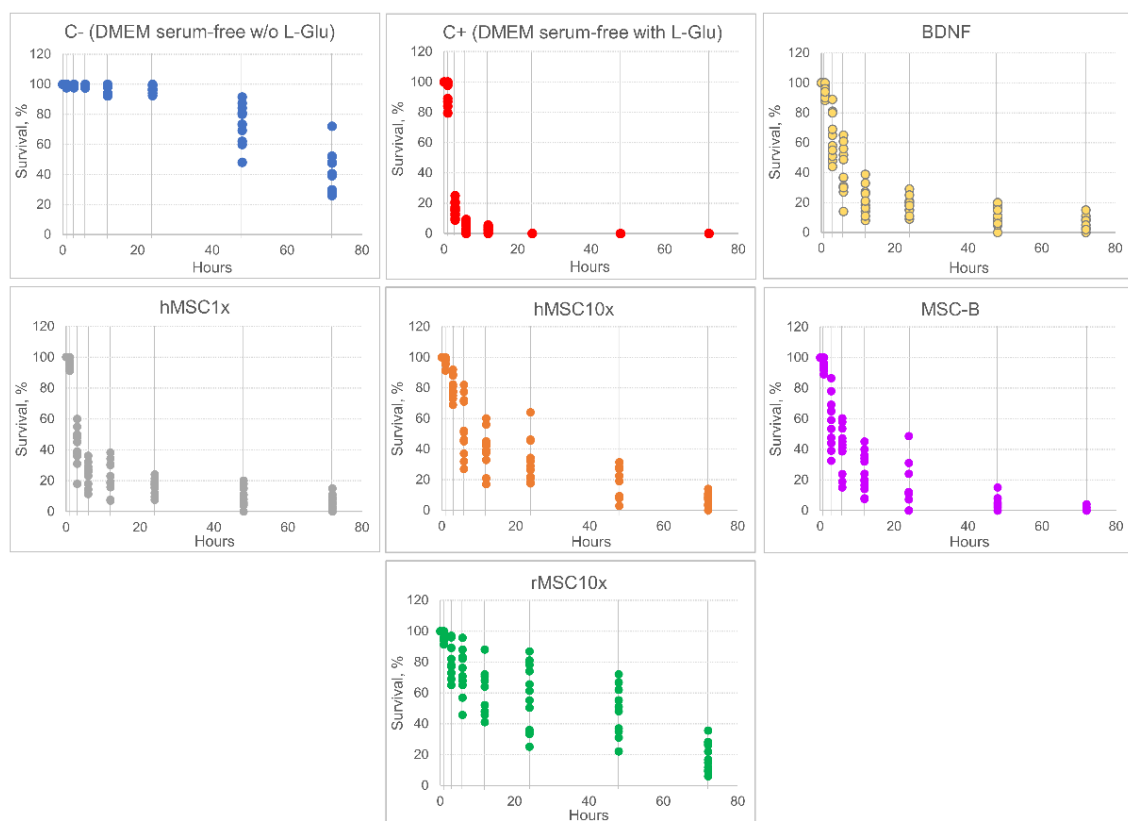

**Figure S4.** Human and rat MSC secretomes support the survival of SH-SY5Y neuroblastoma cells under glutamate-induced neurotoxic conditions (scatter plots).

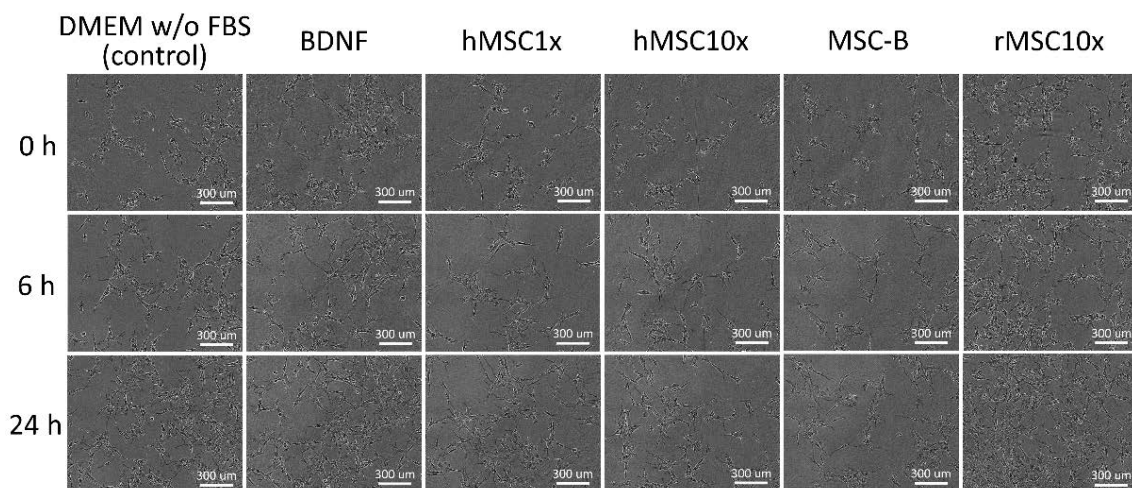

**Figure S5.** Samples of images (raw data) obtained during the study of the ability of MSC secretomes to stimulate neuritogenesis.
